# Supplementary material for: Trends in Antibiotic Resistance Among Ocular Microorganisms in the United States From 2009 to 2018
Source: PubMed Central journal article supplement — JAMA Ophthalmol. 2020 Apr 9;138(5):1–12. doi: 10.1001/jamaophthalmol.2020.0155 (PMC7146550; doi:10.1001/jamaophthalmol.2020.0155), 2020-04-09

## Supplementary Online Content

Asbell PA, Sanfilippo CM, Sahm DF, DeCory HH. Trends in antibiotic resistance among ocular microorganisms in the United States from 2009 to 2018. *JAMA Ophthalmol*. Published online April 9, 2020. doi:10.1001/jamaophthalmol.2020.0155

**eAppendix.** Web-based Interactive Data Visualization Tool

**eTable 1.** Resistance among Ocular Isolates of *S aureus* by Patient Age

**eTable 2.** Resistance among Ocular Isolates of Coagulase-Negative Staphylococci by Patient Age

**eFigure 1.** Resistance among Ocular Isolates of *S pneumoniae* (A) and *P aeruginosa* (B) by Antibiotic Over Time

**eFigure 2.** Resistance to Moxifloxacin Among Methicillin-Resistant *S aureus*

**eFigure 3.** Resistance to Moxifloxacin Among Methicillin-Resistant Coagulase-Negative Staphylococci

**eFigure 4.** Resistance among *S aureus* by Source

**eFigure 5.** Resistance among Coagulase-Negative Staphylococci by Source

**eFigure 6.** Resistance among *S pneumoniae* by Source

**eFigure 7.** Resistance among *P aeruginosa* by Source

This supplementary material has been provided by the authors to give readers additional information about their work.

**eAppendix.** Web-based Interactive Data Visualization Tool

To further explore *in vitro* antibiotic resistance findings from the ARMOR surveillance study for common bacterial pathogens overall or by study year, geographic region, patient age, and ocular tissue source, the authors invite readers to access a web-based interactive data visualization tool available here: <https://armor.ihma.com>

**eTable 1.** Resistance among Ocular Isolates of *S aureus* by Patient Age

Significant pairwise differences are indicated for Mean Resistance (Blue X) and Oxacillin/Methicillin Resistance (Orange O) by decade

| <i>S. aureus</i> | Age Decade |       |       |       |       |       |       |       |       |       |      |
|------------------|------------|-------|-------|-------|-------|-------|-------|-------|-------|-------|------|
| Age Decade       | <10        | 10–19 | 20–29 | 30–39 | 40–49 | 50–59 | 60–69 | 70–79 | 80–89 | 90–99 | ≥100 |
| <10              |            |       |       |       |       |       |       |       |       |       |      |
| 10–19            |            |       |       |       |       |       |       |       |       |       |      |
| 20–29            |            |       |       |       |       |       |       |       |       |       |      |
| 30–39            | X          |       |       |       |       |       |       |       |       |       |      |
| 40–49            |            |       |       |       |       |       |       |       |       |       |      |
| 50–59            |            |       |       |       |       |       |       |       |       |       |      |
| 60–69            | X O        | X     |       |       | X     | X     |       |       |       |       |      |
| 70–79            | X O        | X     | X     |       | X     | X O   |       |       |       |       |      |
| 80–89            | X O        | X O   | X     | X     | X O   | X O   | X     |       |       |       |      |
| 90–99            | X O        | X O   | X     | X     | X O   | X O   | X     | X     |       |       |      |
| ≥100             |            |       |       |       |       |       |       |       |       |       |      |

**eTable 2.** Resistance among Ocular Isolates of Coagulase-Negative Staphylococci by Patient Age

Significant pairwise differences are indicated for Mean Resistance (Blue X) and Oxacillin/Methicillin Resistance (Orange O) by decade.

| <i>S. aureus</i> | Age Decade |       |       |       |       |       |       |       |       |       |      |
|------------------|------------|-------|-------|-------|-------|-------|-------|-------|-------|-------|------|
| Age Decade       | <10        | 10–19 | 20–29 | 30–39 | 40–49 | 50–59 | 60–69 | 70–79 | 80–89 | 90–99 | ≥100 |
| <10              |            |       |       |       |       |       |       |       |       |       |      |
| 10–19            |            |       |       |       |       |       |       |       |       |       |      |
| 20–29            |            |       |       |       |       |       |       |       |       |       |      |
| 30–39            | X          |       |       |       |       |       |       |       |       |       |      |
| 40–49            |            |       |       |       |       |       |       |       |       |       |      |
| 50–59            |            |       |       |       |       |       |       |       |       |       |      |
| 60–69            | X O        | X     |       |       | X     | X     |       |       |       |       |      |
| 70–79            | X O        | X     | X     |       | X     | X O   |       |       |       |       |      |
| 80–89            | X O        | X O   | X     | X     | X O   | X O   | X     |       |       |       |      |
| 90–99            | X O        | X O   | X     | X     | X O   | X O   | X     | X     |       |       |      |
| ≥100             |            |       |       |       |       |       |       |       |       |       |      |

**eFigure 1.** Resistance among Ocular Isolates of *S pneumoniae* (A) and *P aeruginosa* (B) by Antibiotic Over Time

*P*-values were calculated using a Cochran-Armitage test to identify significant linear trends in resistance, and were not significant ( $P>.05$ )

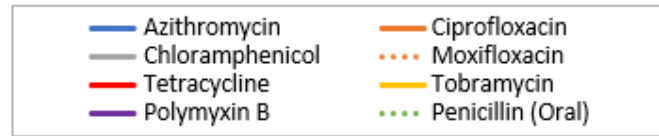

**A. *S. pneumoniae***

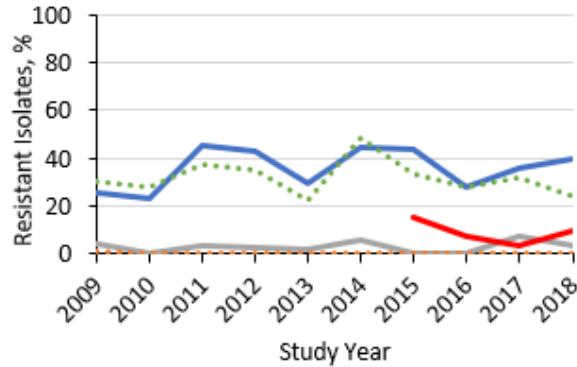

**B. *P. aeruginosa***

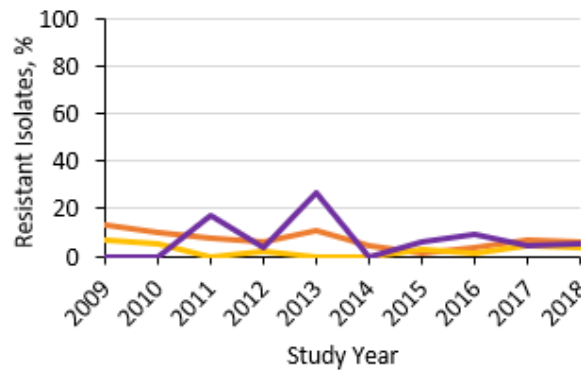

**eFigure 2.** Resistance to Moxifloxacin Among Methicillin-Resistant *S aureus* (<https://armor.ihma.com>)

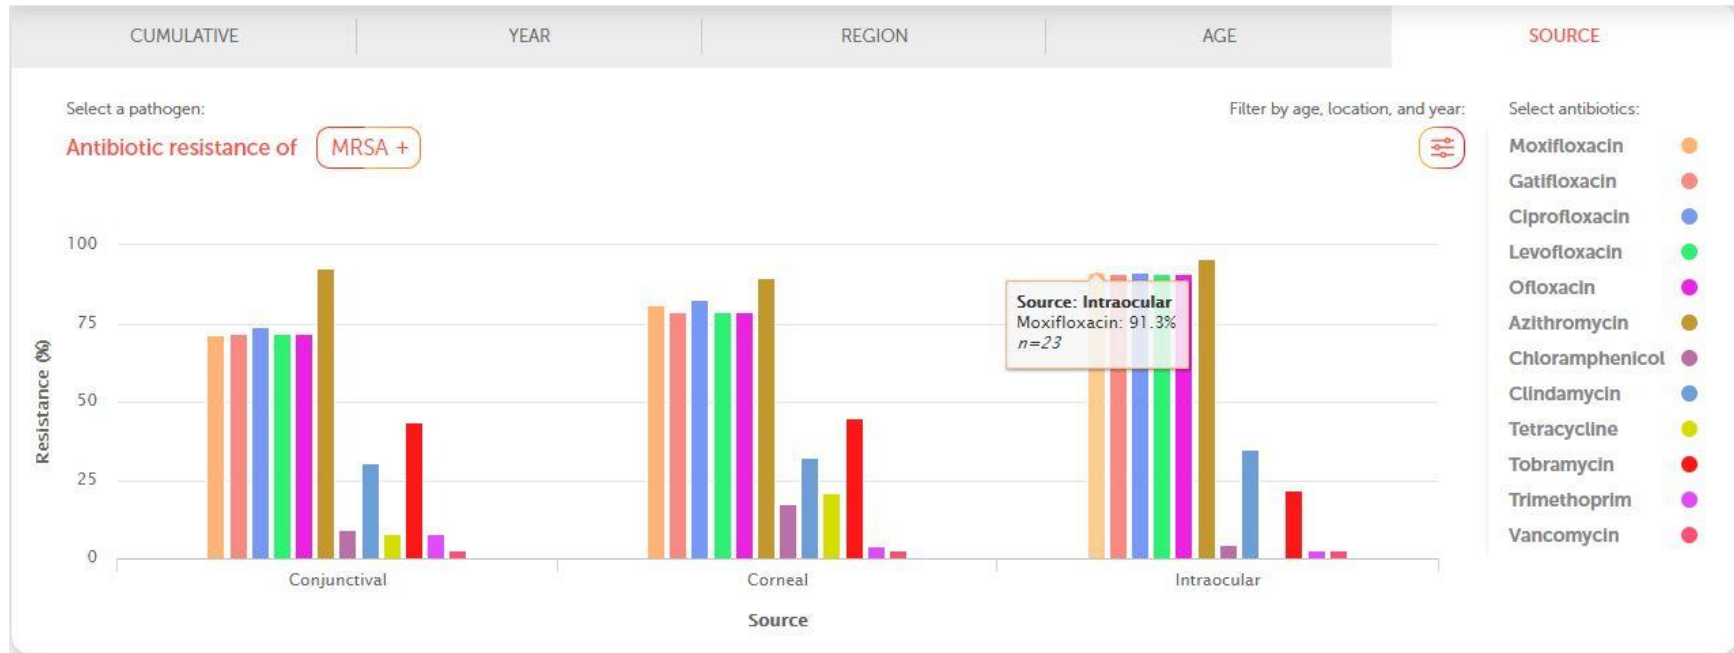

**eFigure 3.** Resistance to Moxifloxacin Among Methicillin-Resistant Coagulase-Negative Staphylococci (<https://armor.ihma.com>)

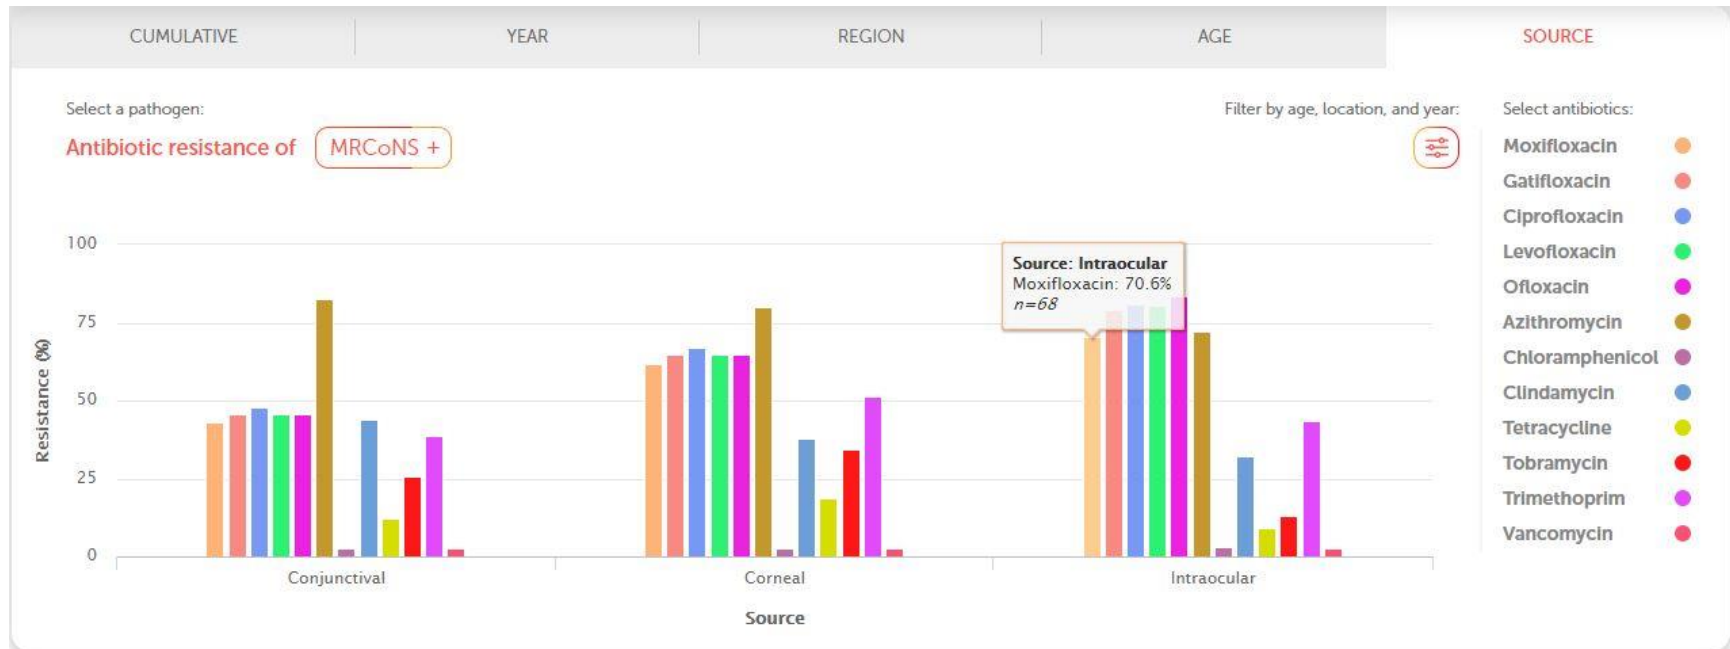

**eFigure 4.** Resistance among *S aureus* by Source (<https://armor.ihma.com>)

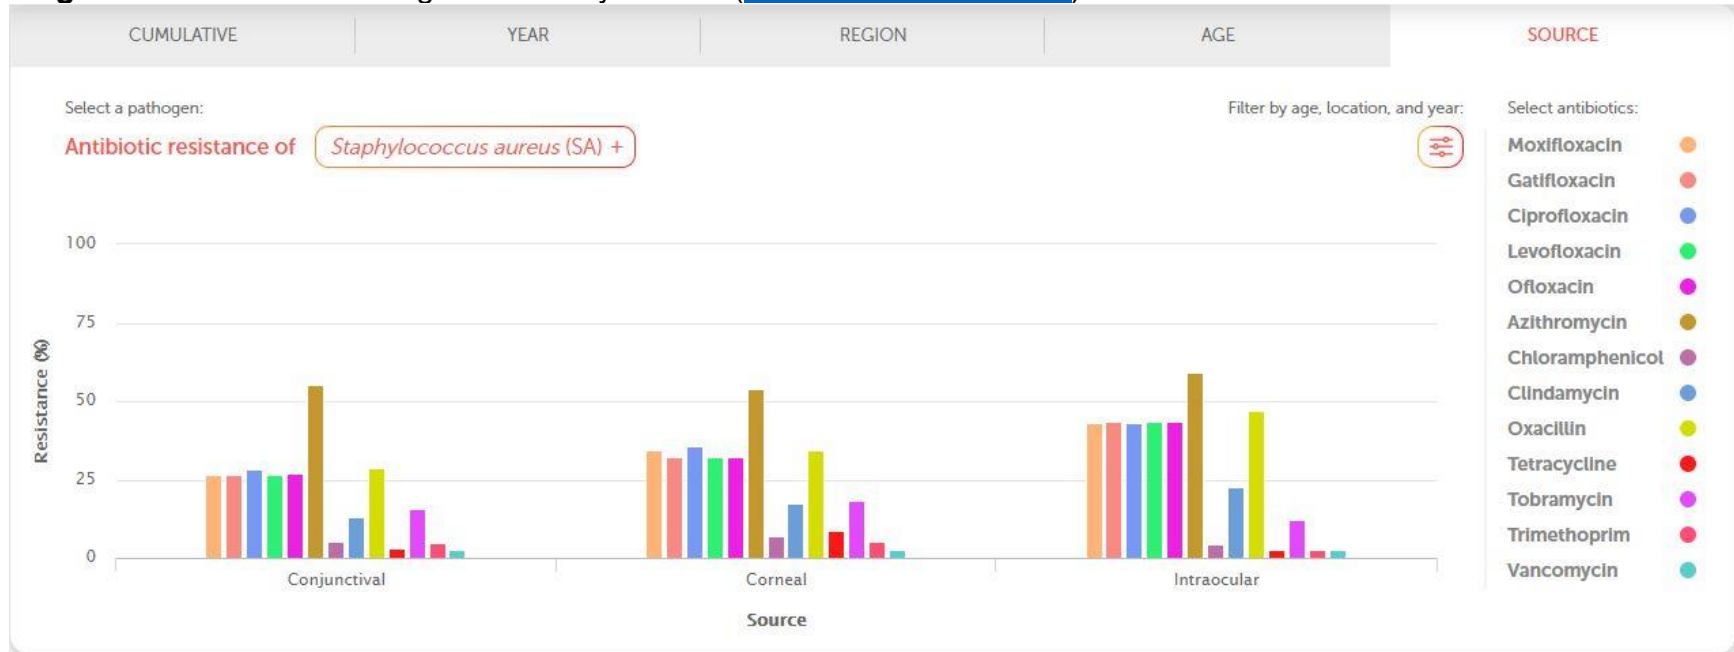



**eFigure 5.** Resistance among Coagulase-Negative Staphylococci by Source (<https://armor.ihma.com>)

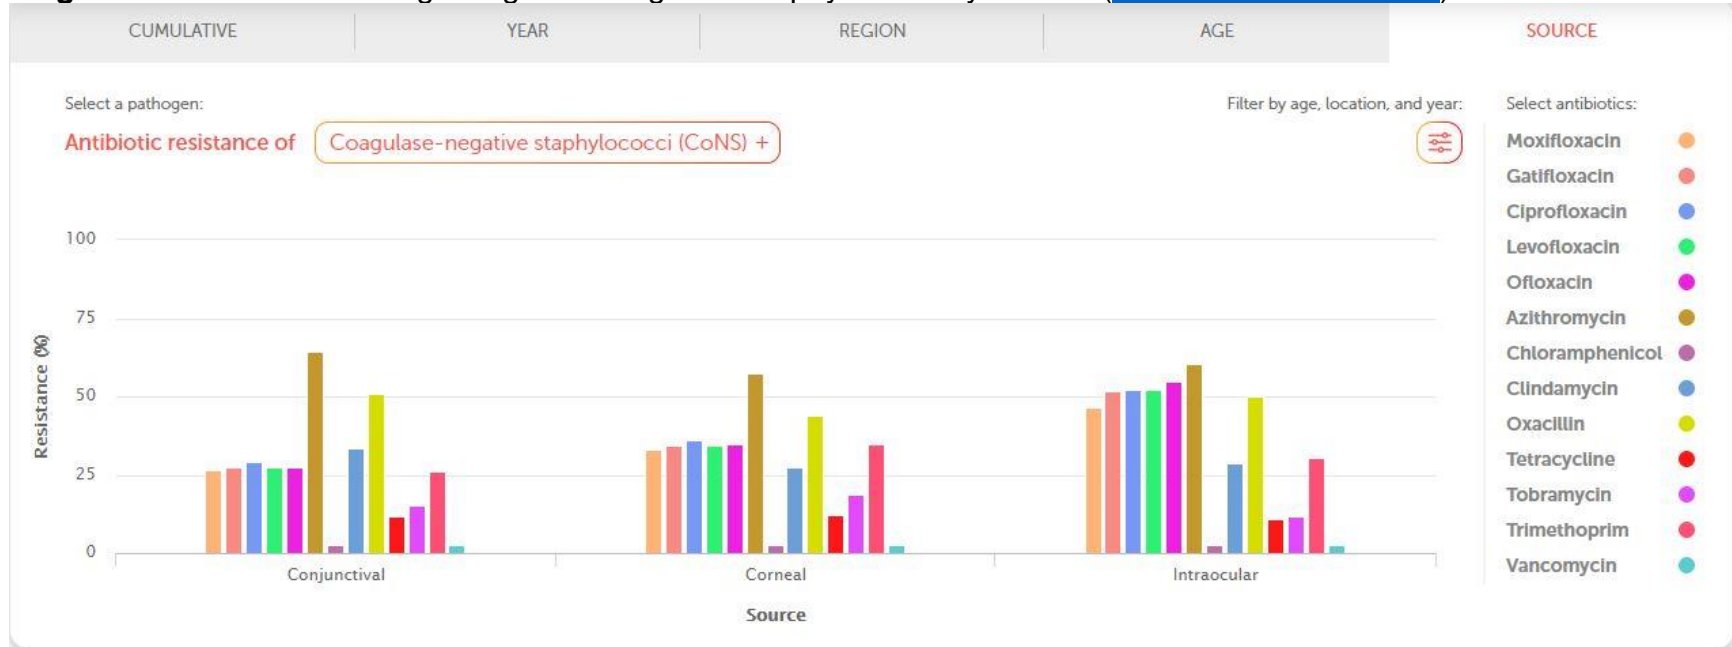

eFigure 6. Resistance among *S pneumoniae* by Source (<https://armor.ihma.com>)

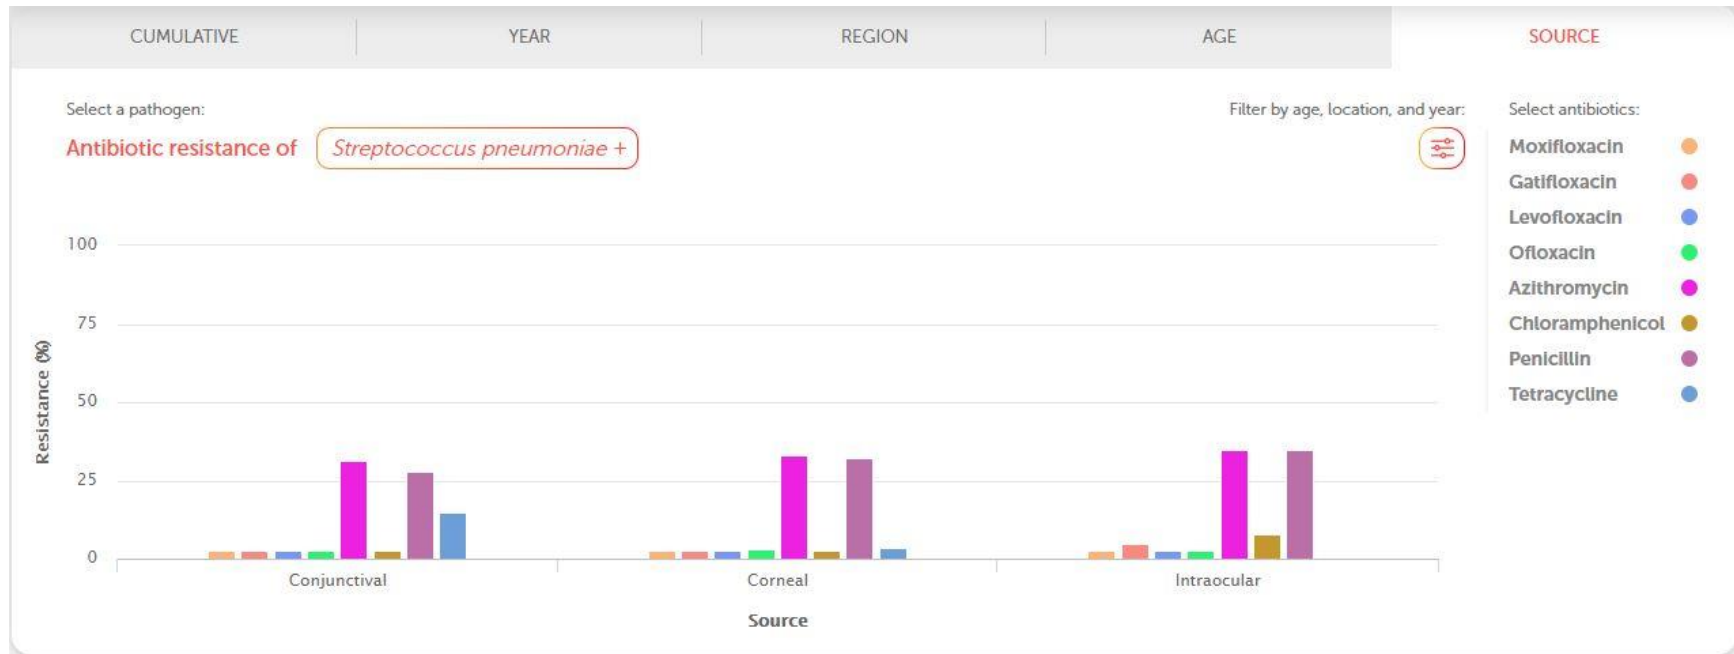

**eFigure 7.** Resistance among *P aeruginosa* by Source (<https://armor.ihma.com>)

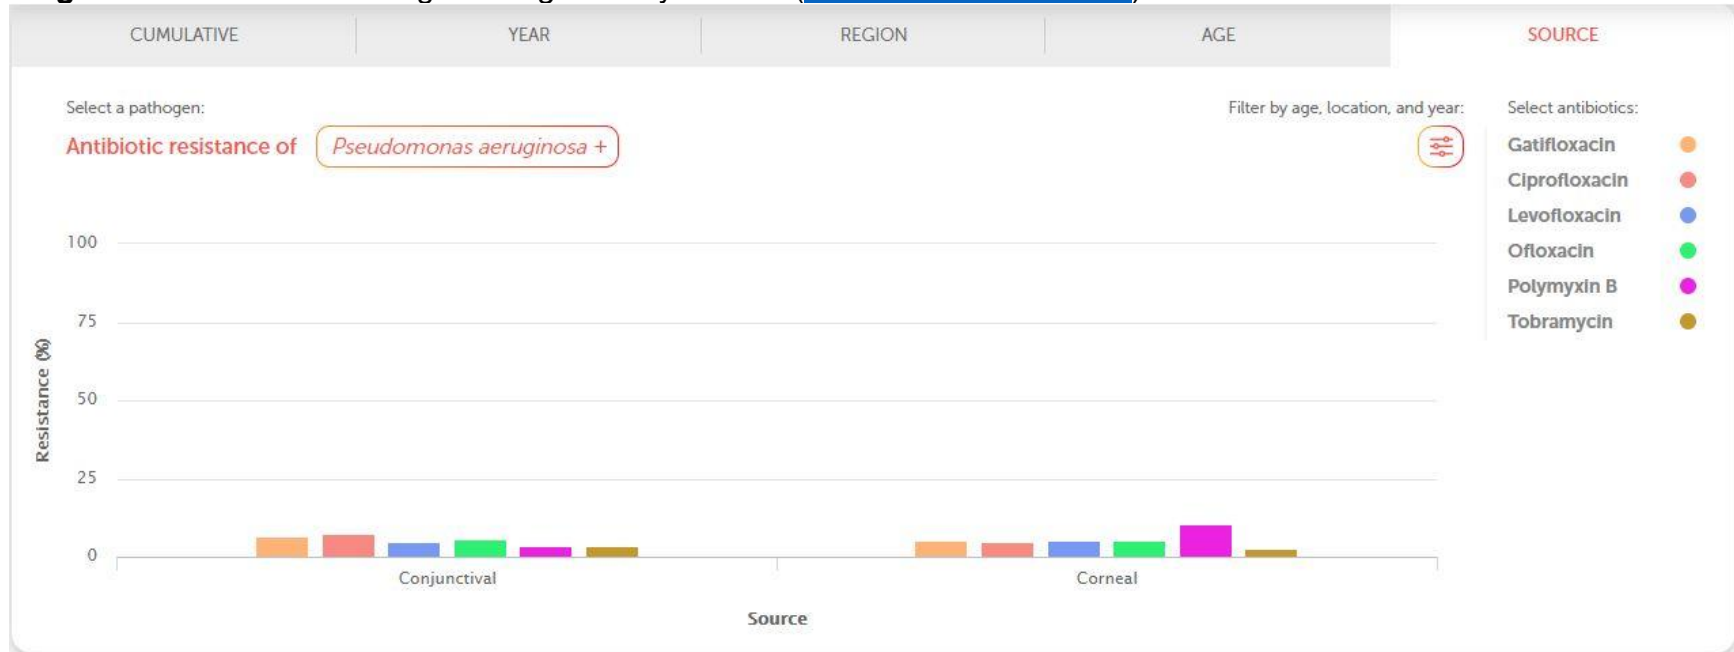

Supplement: jamaophthalmol-138-439-s001.pdf [file jamaophthalmol-138-439-s001.pdf]
